# Supplementary material for: Application of modified gemcitabine-loaded solid lipid nanoparticle in the treatment of pancreatic cancer patient-derived xenograft model
Source: Research Square preprint supplement (doi:10.21203/rs.3.rs-1777458/v1), 2022-08-10
Supplement: Supplementary file 1 [file 281b55026b4581a6dcca23b7.docx]

**Supplementary Figure 1A (SF 1A)**


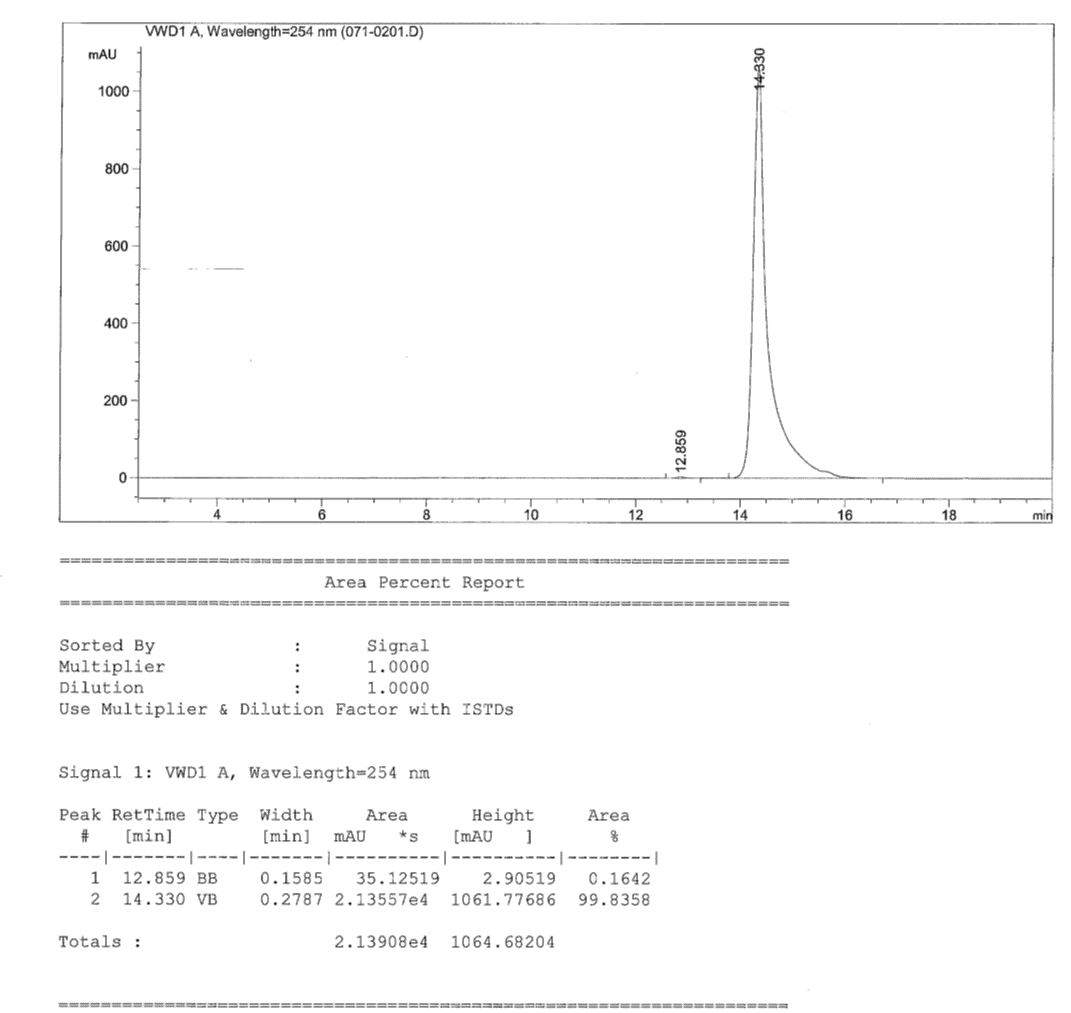


**Supplementary Figure 1B (SF 1B)**


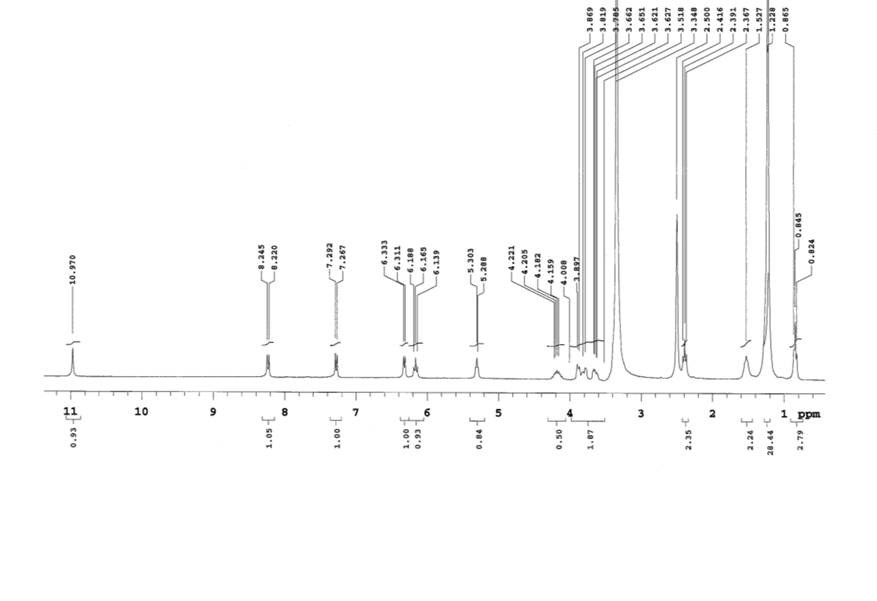


**Supplementary Figure 1C (SF 1C)**


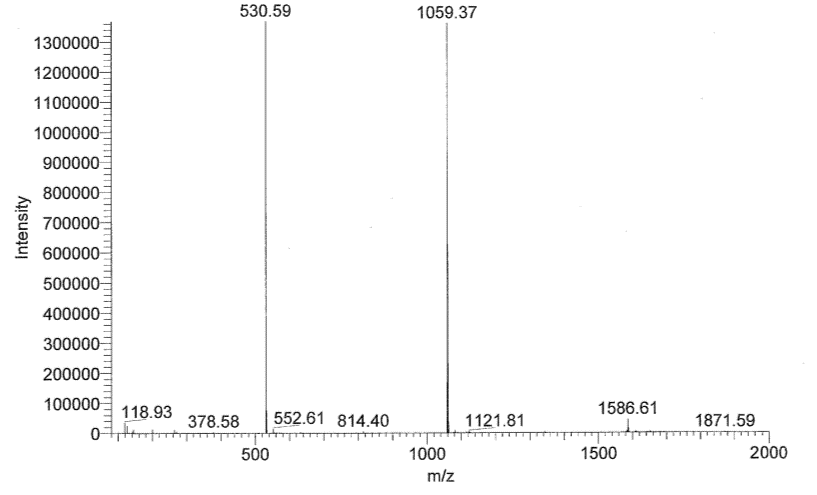


**Supplementary Figure 2 (SF2 )**

**
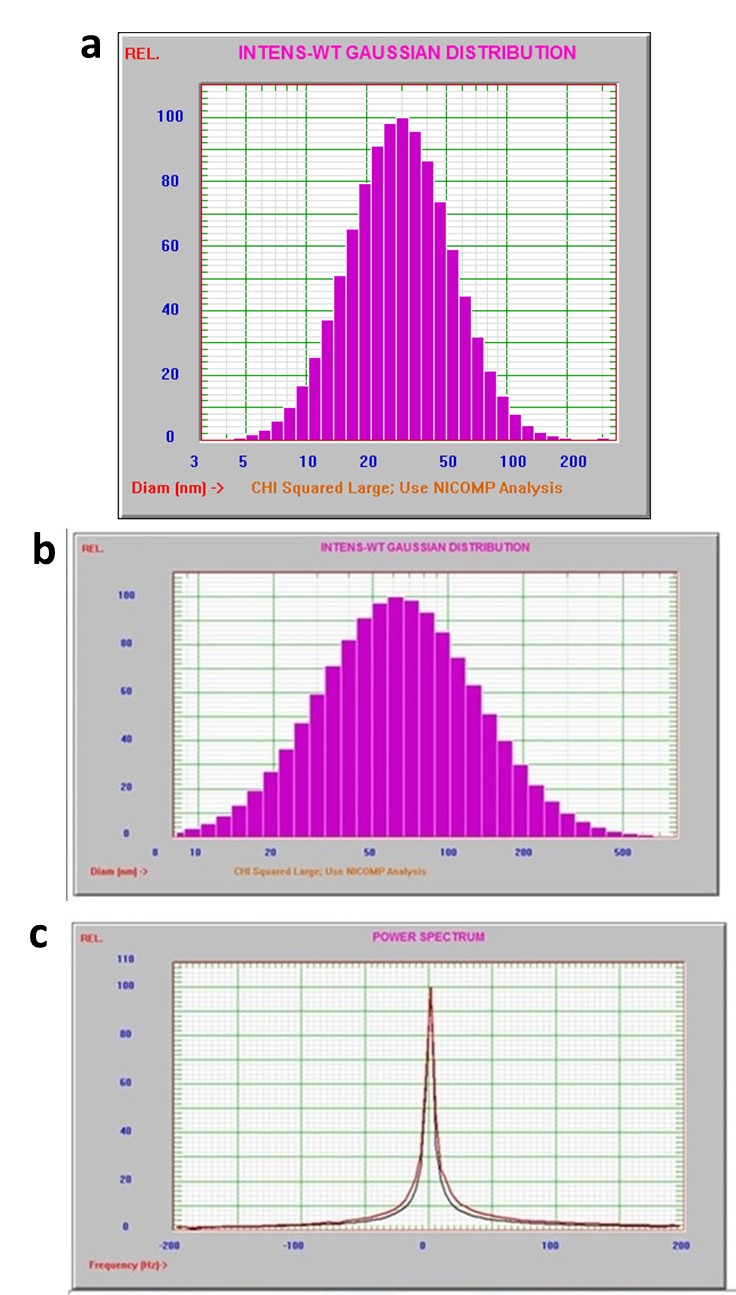
**

**Supplementary Figure Legends**

**Supplementary Figure 1A (SF 1A)**

HPLC spectrum for detecting the purity of 4NSG at 254 nm

**Supplementary Figure 1B (SF 1B)**

Proton nuclear resonance imaging (1HNMR) for 4NSG

**Supplementary Figure 1C (SF 1C)**

Mass spectrum for 4NSG at 530.59 m/z

**Supplementary Figure 2 (SF2)**

Dynamic light scattering (DLS)graph showing the hydrodynamic particle size distribution of freshly prepared SLN with a mean diameter of 35 nm, (b) Dynamic light scattering (DLS)graph showing the hydrodynamic particle size distribution of freshly prepared SLN with a mean diameter of 82 nm, (c) Graph of zeta potential distribution for 4NSG-SLN
